# Supplementary material
Source: PubMed Central journal article supplement (PMC4237702)

## DESCRIPTION

Modification of TestDiet® AIN-76A Semi-Purified Diet 58B0 with 35% Protein and 1.6% total Arginine. Contains glucose anhydrous and lecithin. Does not contain cornstarch.

Storage conditions are particularly critical to TestDiet® products, due to the absence of antioxidants or preservative agents. To provide maximum protection against possible changes during storage, store in a dry, cool location. Storage under refrigeration (2° C) is recommended. Maximum shelf life is six months. (If long term studies are involved, storing the diet at -20° C or colder may prolong shelf life.) Be certain to keep in air tight containers.

**Product Forms Available\*      Catalog #**  
 1/2" Pellet                              1813675

\*Other Forms Available On Re  
**INGREDIENTS (%)**

|                       |         |
|-----------------------|---------|
| Casein - Vitamin Free | 39.2450 |
| Dextrin               | 18.3550 |
| Sucrose               | 15.7000 |
| Glucose               | 10.7000 |
| Powdered Cellulose    | 5.0000  |
| Corn Oil              | 4.0000  |
| AIN 93M Mineral Mix   | 3.5000  |
| Lecithin              | 2.0000  |
| AIN 93 Vitamin Mix    | 1.0000  |
| L-Cystine             | 0.3000  |
| Choline Bitartrate    | 0.2000  |

## NUTRITIONAL PROFILE <sup>1</sup>

|                   |             |                           |      |
|-------------------|-------------|---------------------------|------|
| <b>Protein, %</b> | <b>35.0</b> | <b>Minerals</b>           |      |
| Arginine, %       | 1.37        | Calcium, %                | 0.51 |
| Histidine, %      | 1.01        | Phosphorus, %             | 0.57 |
| Isoleucine, %     | 1.88        | Phosphorus (available), % | 0.37 |
| Leucine, %        | 3.39        | Potassium, %              | 0.38 |
| Lysine, %         | 2.85        | Magnesium, %              | 0.05 |
| Methionine, %     | 1.01        | Sodium, %                 | 0.12 |
| Cystine, %        | 0.44        | Chloride, %               | 0.19 |
| Phenylalanine, %  | 1.88        | Fluorine, ppm             | 1.0  |
| Tyrosine, %       | 1.99        | Iron, ppm                 | 37   |
| Threonine, %      | 1.52        | Zinc, ppm                 | 43   |
| Tryptophan, %     | 0.43        | Manganese, ppm            | 11   |
| Valine, %         | 2.24        | Copper, ppm               | 6.0  |
| Alanine, %        | 1.08        | Cobalt, ppm               | 0.0  |
| Aspartic Acid, %  | 2.53        | Iodine, ppm               | 0.21 |
| Glutamic Acid, %  | 8.01        | Chromium, ppm             | 1.0  |
| Glycine, %        | 0.76        | Molybdenum, ppm           | 0.14 |
| Proline, %        | 4.62        | Selenium, ppm             | 0.30 |
| Serine, %         | 2.17        |                           |      |
| Taurine, %        | 0.00        |                           |      |

|                                      |            |                               |       |
|--------------------------------------|------------|-------------------------------|-------|
| <b>Fat, %</b>                        | <b>5.1</b> | <b>Vitamins</b>               |       |
| Cholesterol, ppm                     | 0          | Vitamin A, IU/g               | 4.0   |
| Linoleic Acid, %                     | 2.90       | Vitamin D-3 (added), IU/g     | 1.0   |
| Linolenic Acid, %                    | 0.08       | Vitamin E, IU/kg              | 76.0  |
| Arachidonic Acid, %                  | 0.00       | Vitamin K (as menadione), ppm | 0.29  |
| Omega-3 Fatty Acids, %               | 0.08       | Thiamin Hydrochloride, ppm    | 6.1   |
| Total Saturated Fatty A              | 0.75       | Riboflavin, ppm               | 7.4   |
| Total Monounsaturated Fatty Acids, % | 0.98       | Niacin, ppm                   | 30    |
| Polyunsaturated Fatty Acids, %       | 2.32       | Pantothenic Acid, ppm         | 17    |
|                                      |            | Folic Acid, ppm               | 2.3   |
|                                      |            | Pyridoxine, ppm               | 5.8   |
|                                      |            | Biotin, ppm                   | 0.2   |
|                                      |            | Vitamin B-12, mcg/kg          | 32    |
|                                      |            | Choline Chloride, ppm         | 1,808 |
|                                      |            | Ascorbic Acid, ppm            | 0.0   |

|                                     |             |          |  |
|-------------------------------------|-------------|----------|--|
| <b>Fiber (max), %</b>               | <b>5.0</b>  |          |  |
| <b>Carbohydrates, %</b>             | <b>45.7</b> |          |  |
| <b>Energy (kcal/g) <sup>2</sup></b> | <b>3.55</b> |          |  |
| <b>From:</b>                        | <b>kcal</b> | <b>%</b> |  |
| Protein                             | 1.400       | 38.0     |  |
| Fat (ether extract)                 | 0.455       | 12.4     |  |
| Carbohydrates                       | 1.829       | 49.6     |  |

1. Based on the latest ingredient analysis information. Since nutrient composition of natural ingredients varies, analysis will differ accordingly. Nutrients expressed as percent of ration on an As-Fed basis except where otherwise indicated.  
 2. Energy (kcal/gm) - Sum of decimal fractions of protein, fat and carbohydrate x 4,9,4 kcal/gm respectively.

## FEEDING DIRECTIONS

Feed ad libitum. Plenty of fresh, clean water should be available at all times.

**CAUTION:**  
 Perishable - store properly upon receipt.  
 For laboratory animal use only; NOT for human consumption.

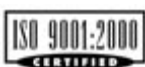

Supplement: NIHMS635549-supplement-Table_S2.pdf [file NIHMS635549-supplement-Table_S2.pdf]
