# Supplementary material
Source: PubMed Central journal article supplement (PMC4237702)
Supplement: NIHMS635549-supplement-Table_S1.pdf [file NIHMS635549-supplement-Table_S1.pdf]

# Modified AIN-76A w/ 20% Protein and 0.8% Arginine

5SRJ

## DESCRIPTION

Modification of TestDiet® AIN-76A Semi-Purified Diet 58B0 with 20% Protein and 0.8% total Arginine. Contains glucose anhydrous and lecithin. Does not contain cornstarch.

Storage conditions are particularly critical to TestDiet® products, due to the absence of antioxidants or preservative agents. To provide maximum protection against possible changes during storage, store in a dry, cool location. Storage under refrigeration (2° C) is recommended. Maximum shelf life is six months. (If long term studies are involved, storing the diet at -20° C or colder may prolong shelf life.) Be certain to keep in air tight containers.

**Product Forms Available\*      Catalog #**  
1/2" Pellet                              1813657

\*Other Forms Available On Re  
**INGREDIENTS (%)**

|                       |         |
|-----------------------|---------|
| Dextrin               | 35.3425 |
| Casein - Vitamin Free | 22.2575 |
| Sucrose               | 15.7000 |
| Glucose               | 10.7000 |
| Powdered Cellulose    | 5.0000  |
| Corn Oil              | 4.0000  |
| AIN 93M Mineral Mix   | 3.5000  |
| Lecithin              | 2.0000  |
| AIN 93 Vitamin Mix    | 1.0000  |
| L-Cystine             | 0.3000  |
| Choline Bitartrate    | 0.2000  |

## NUTRITIONAL PROFILE <sup>1</sup>

|                                      |             |                               |       |
|--------------------------------------|-------------|-------------------------------|-------|
| <b>Protein, %</b>                    | <b>20.0</b> | <b>Minerals</b>               |       |
| Arginine, %                          | 0.78        | Calcium, %                    | 0.51  |
| Histidine, %                         | 0.57        | Phosphorus, %                 | 0.44  |
| Isoleucine, %                        | 1.06        | Phosphorus (available), %     | 0.24  |
| Leucine, %                           | 1.92        | Potassium, %                  | 0.38  |
| Lysine, %                            | 1.62        | Magnesium, %                  | 0.05  |
| Methionine, %                        | 0.57        | Sodium, %                     | 0.13  |
| Cystine, %                           | 0.38        | Chloride, %                   | 0.18  |
| Phenylalanine, %                     | 1.06        | Fluorine, ppm                 | 1.0   |
| Tyrosine, %                          | 1.13        | Iron, ppm                     | 36    |
| Threonine, %                         | 0.86        | Zinc, ppm                     | 37    |
| Tryptophan, %                        | 0.25        | Manganese, ppm                | 11    |
| Valine, %                            | 1.27        | Copper, ppm                   | 6.0   |
| Alanine, %                           | 0.61        | Cobalt, ppm                   | 0.0   |
| Aspartic Acid, %                     | 1.43        | Iodine, ppm                   | 0.21  |
| Glutamic Acid, %                     | 4.55        | Chromium, ppm                 | 1.0   |
| Glycine, %                           | 0.43        | Molybdenum, ppm               | 0.14  |
| Proline, %                           | 2.62        | Selenium, ppm                 | 0.25  |
| Serine, %                            | 1.23        |                               |       |
| Taurine, %                           | 0.00        | <b>Vitamins</b>               |       |
| <b>Fat, %</b>                        | <b>5.1</b>  | Vitamin A, IU/g               | 4.0   |
| Cholesterol, ppm                     | 0           | Vitamin D-3 (added), IU/g     | 1.0   |
| Linoleic Acid, %                     | 2.90        | Vitamin E, IU/kg              | 76.0  |
| Linolenic Acid, %                    | 0.08        | Vitamin K (as menadione), ppm | 0.29  |
| Arachidonic Acid, %                  | 0.00        | Thiamin Hydrochloride, ppm    | 6.1   |
| Omega-3 Fatty Acids, %               | 0.08        | Riboflavin, ppm               | 6.8   |
| Total Saturated Fatty A              | 0.75        | Niacin, ppm                   | 30    |
| Total Monounsaturated Fatty Acids, % | 0.98        | Pantothenic Acid, ppm         | 16    |
| Polyunsaturated Fatty Acids, %       | 2.32        | Folic Acid, ppm               | 2.2   |
|                                      |             | Pyridoxine, ppm               | 5.8   |
| <b>Fiber (max), %</b>                | <b>5.0</b>  | Biotin, ppm                   | 0.2   |
|                                      |             | Vitamin B-12, mcg/kg          | 29    |
| <b>Carbohydrates, %</b>              | <b>62.7</b> | Choline Chloride, ppm         | 1,808 |
|                                      |             | Ascorbic Acid, ppm            | 0.0   |
| <b>Energy (kcal/g) <sup>2</sup></b>  | <b>3.65</b> |                               |       |
| <b>From:</b>                         | <b>kcal</b> | <b>%</b>                      |       |
| Protein                              | 0.800       | 21.3                          |       |
| Fat (ether extract)                  | 0.455       | 12.1                          |       |
| Carbohydrates                        | 2.509       | 66.6                          |       |

1. Based on the latest ingredient analysis information. Since nutrient composition of natural ingredients varies, analysis will differ accordingly. Nutrients expressed as percent of ration on an As-Fed basis except where otherwise indicated.  
2. Energy (kcal/gm) - Sum of decimal fractions of protein, fat and carbohydrate x 4,9,4 kcal/gm respectively.

## FEEDING DIRECTIONS

Feed ad libitum. Plenty of fresh, clean water should be available at all times.

**CAUTION:**  
Perishable - store properly upon receipt.  
For laboratory animal use only; NOT for human consumption.

5/5/2009

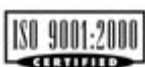

**TestDiet**  
www.testdiet.com
